# Supplementary material for: Tuning the physicochemical properties of reticular covalent organic frameworks (COFs) for biomedical applications
Source: Royal Society of Chemistry journal article supplement (doi:10.1039/d1tb01124c), 2021-01-01
Supplement: d1tb01124c1.pdf [file d1tb01124c1.pdf]

*Supporting Information*

**Tuning the physicochemical properties of reticular covalent  
organic frameworks (COFs) for biomedical applications**

Chunyang Liao\* and Sijin Liu\*

State Key Laboratory of Environmental Chemistry and Ecotoxicology, Research Center for Eco-  
Environmental Sciences, Chinese Academy of Sciences, Beijing 100085, China

**Corresponding authors:** cyliao@rcees.ac.cn; sjliu@rcees.ac.cn

**Table S1. The synthetic strategies of COFs.**

| Synthetic method             | Procedure                                                                                                                                                                                | Advantage                                                                                        | Limitation                                                                                                                                                                                                               | Ref.   |
|------------------------------|------------------------------------------------------------------------------------------------------------------------------------------------------------------------------------------|--------------------------------------------------------------------------------------------------|--------------------------------------------------------------------------------------------------------------------------------------------------------------------------------------------------------------------------|--------|
| <b>Bottom-up strategy</b>    |                                                                                                                                                                                          |                                                                                                  |                                                                                                                                                                                                                          |        |
| Solvothermal method          | Disperse monomers in solvents. Seal the vessel and react under a certain temperature (80-120 °C) for several days.                                                                       | The most commonly used synthetic method for COFs; simple and straightforward.                    | Request strict synthetic condition and long reaction time; need a large amount of organic solvent, which may cause environmental pollution; produce COF product as powder, which is hard for incorporating into devices. | [1,2]  |
| Ionothermal method           | Use ionic liquid (e.g. ZnCl <sub>2</sub> ) as solvent, which is a relatively complex solvothermal strategy.                                                                              | Mild and green; able to obtain crystalline structure.                                            | Difficult to control crystallinity; require high reaction temperature thus narrow the scope of building units.                                                                                                           | [3,4]  |
| Microwave-assisted synthesis | Dissolve monomers in solvent and sealed with nitrogen. Heat the system by microwave irradiation and kept at certain temperature for several minutes.                                     | Fast and clean, providing new possibility for further applications in large scale.               | Obtain COFs as powder.                                                                                                                                                                                                   | [5,6]  |
| Mechanochemical method       | Place the monomers in a mortar and ground by using a pestle at room temperature; catalyst solution is needed in some cases added to enhance the reaction rate and improve crystallinity. | Easy to operate; eco-friendly and timesaving, which is promising to produce COFs in large-scale. | The suitable monomers and reaction are limited.                                                                                                                                                                          | [7,8]  |
| Interfacial synthesis        | A widely used approach for the fabrication of thin films.<br>Solid-vapor interface synthesis: under ultrahigh vacuum, halogenate monomers will be turned into vapor at first and         | Efficient method for fabricating COF thin films with simultaneous control of their thickness.    | The production capacity is rather low.                                                                                                                                                                                   | [9,10] |

|                              |                                                                                                                                                                                                                           |                                                                                                                                                      |                                                                                                                                                                                                          |         |
|------------------------------|---------------------------------------------------------------------------------------------------------------------------------------------------------------------------------------------------------------------------|------------------------------------------------------------------------------------------------------------------------------------------------------|----------------------------------------------------------------------------------------------------------------------------------------------------------------------------------------------------------|---------|
|                              | deposited on the surface of clean metal surface; Liquid-liquid interface synthesis: dissolve monomers and catalysts in two immiscible solvents. Monomers are polymerized and transformed into thin film at the interface. |                                                                                                                                                      |                                                                                                                                                                                                          |         |
| <b>Top-down strategy</b>     |                                                                                                                                                                                                                           |                                                                                                                                                      |                                                                                                                                                                                                          |         |
| Solvent-assisted exfoliation | Weaken the $\pi$ - $\pi$ interaction between the COF layers with the help of a suitable solvent ( $\text{CH}_2\text{Cl}_2$ , $\text{CHCl}_3$ , MeOH, and Tetrahydrofuran, etc.)                                           | The most used method for COF exfoliation; enable the high-yield and large-scale production of ultrathin nanosheets in solution at low cost.          | The crystallinity of COF may decrease; monolayered nanosheet is difficult to obtain; the aggregation of monolayers exists due to the stacking interaction; the yield of COF thin film is relatively low. | [11,12] |
| Mechanical delamination      | Break the strong $\pi$ - $\pi$ interactions between the COF layers through mechanical grinding.                                                                                                                           | Effective and solvent-free                                                                                                                           |                                                                                                                                                                                                          | [13,14] |
| Chemical exfoliation         | Intercalate groups into the COF backbone through chemical reaction. Weaken the planarity of each layer and the $\pi$ - $\pi$ stacking between layers.                                                                     | Improved aqueous dispersibility; easier to control the thickness of COFs; able to introduce functional groups.                                       |                                                                                                                                                                                                          | [15,16] |
| Self-exfoliation method      | Choose well-designed building blocks to induce peeling-off by an internal force. Introduce certain groups to enlarge the distance between neighboring layers and reduce the $\pi$ - $\pi$ interaction.                    | Simple; avoid restacking; the ionic building units can not only initiate the self-exfoliation process but also introduce targeted functional groups. |                                                                                                                                                                                                          | [17,18] |

## Reference:

- [1] X. Feng, X. Ding, D. L. Jiang, *Chem. Soc. Rev.* **2012**, *41*, 6010–6022.
- [2] L. J. Zhu, Y. B. Zhang, *Molecules* **2017**, *22*, 1149.
- [3] P. Kuhn, M. Antonietti, A. Thomas, *Angew. Chem. Int. Ed.* **2008**, *47*, 3450–3453.
- [4] X. Y. Guan, Y. C. Ma, H. Li, Y. Yusran, M. Xue, Q. R. Fang, Y. S. Yan, V. Valtchev, S. L. Qiu, *J. Am. Chem. Soc.* **2018**, *140*, 4494–4498.
- [5] J. L. Ge, J. D. Xiao, L. L. Liu, L. G. Qiu, X. Jiang, *J. Porous Mater.* **2016**, *23*, 791–800.
- [6] D. D. Hao, J. N. Zhang, H. Lu, W. G. Leng, R. Ge, X. D. Dai, Y. N. Gao, *Chem. Commun.* **2014**, *50*, 1462–1464.
- [7] S. Chandra, S. Kandambeth, B. P. Biswal, B. Lukose, S. M. Kunjir, M. Chaudhary, R. Babarao, T. Heine, R. Banerjee, *J. Am. Chem. Soc.* **2013**, *135*, 17853–17861.
- [8] S. Karak, S. Kandambeth, B. P. Biswal, H. S. Sasmal, S. Kumar, P. Pachfule, R. Banerjee, *J. Am. Chem. Soc.* **2017**, *139*, 1856–1862.
- [9] A. C. Marele, R. Mas-Balleste, L. Terracciano, J. Rodriguez-Fernandez, I. Berlanga, S. S. Alexandre, R. Otero, J. M. Gallego, F. Zamora, J. M. Gomez-Rodriguez, *Chem. Commun.* **2012**, *48*, 6779–6781.
- [10] K. Dey, M. Pal, K. C. Rout, H. S. Kunjattu, A. Das, R. Mukherjee, U. K. Kharul, R. Banerjee, *J. Am. Chem. Soc.* **2017**, *139*, 13083–13091.
- [11] Y. W. Peng, Y. Huang, Y. H. Zhu, B. Chen, L. Y. Wang, Z. C. Lai, Z. C. Zhang, M. T. Zhao, C. L. Tan, N. L. Yang, F. W. Shao, Y. Han, H. Zhang, *J. Am. Chem. Soc.* **2017**, *139*, 8698–8704.
- [12] G. Li, K. Zhang, T. Tsuru, *ACS Appl. Mater. Interfaces* **2017**, *9*, 8433–8436.
- [13] S. Wang, Q. Y. Wang, P. P. Shao, Y. Z. Han, X. Gao, L. Ma, S. Yuan, X. J. Ma, J. W. Zhou, X. Feng, B. Wang, *J. Am. Chem. Soc.* **2017**, *139*, 4258–4261.
- [14] X. W. Mu, J. Zhan, X. M. Feng, B. H. Yuan, S. L. Qiu, L. Song, Y. Hu, *ACS Appl. Mater. Interfaces* **2017**, *9*, 23017–23026.
- [15] M. A. Khayum, S. Kandambeth, S. Mitra, S. B. Nair, A. Das, S. S. Nagane, R. Mukherjee, R. Banerjee, *Angew. Chem. Int. Ed.* **2016**, *55*, 15604–15608; *Angew. Chem.* **2016**, *128*, 15833–15837.
- [16] L. Ji, G. N. Guo, H. Y. Sheng, S. L. Qin, B. W. Wang, D. D. Han, T. T. Li, D. Yang, A. G. Dong, *Chem. Mater.* **2016**, *28*, 3823–3830.
- [17] Z. Kahveci, T. Islamoglu, G. A. Shar, R. Ding, H. M. El-Kaderi, *CrystEngComm* **2013**, *15*, 1524–1527.
- [18] S. Mitra, S. Kandambeth, B. P. Biswal, M. A. Khayum, C. K. Choudhury, M. Mehta, G. Kaur, S. Banerjee, A. Prabhune, S. Verma, S. Roy, U. K. Kharu, R. Banerjee, *J. Am. Chem. Soc.* **2016**, *138*, 2823–2828.
